# Supplementary material for: A new tool to measure approaches to supervision from the perspective of community health workers: a prospective, longitudinal, validation study in seven countries
Source: Springer Nature journal article supplement (doi:10.1186/s12913-018-3595-7), 2018-10-22
Supplement: MOESM1 [file 16217352]

**Table S1.** Summary of Ethical Approvals

| Ethical Review Committee                                                                                                       | Country      |
|--------------------------------------------------------------------------------------------------------------------------------|--------------|
| <b>Phase I</b>                                                                                                                 |              |
| Health Policy and Management/Centre for Global Health Ethical Review Committee, Trinity College Dublin                         | Ireland      |
| Connaught Hospital, Freetown                                                                                                   | Sierra Leone |
| <b>Phase II</b>                                                                                                                |              |
| Liverpool School of Tropical Medicine Research Ethics Committee                                                                | UK           |
| James P Grant School of Public Health, BRAC University Ethical Review Committee in Bangladesh                                  | Bangladesh   |
| Kenya Medical Research Institute Ethics Review Committee                                                                       | Kenya        |
| Eijkman Institute Research Ethics Commission in Indonesia                                                                      | Indonesia    |
| National Health Sciences Research Committee, Ministry of Health Malawi                                                         | Malawi       |
| The Research and Technology Transfer Support Process at the Southern Nations, Nationalities and Peoples Regional Health Bureau | Ethiopia     |
| Comité Institucional de Bioética em Saude da Faculdade de Medicina, Hospital Central de Maputo in Mozambique                   | Mozambique   |

**Table S2.** Pre- and post-refinement standardised factor loadings and standard errors for the PSS during Phase I.

| Item                                                                                             | $\lambda_{pre}$ | SE <sub>pre</sub> | $\lambda_{post}$ | SE <sub>post</sub> |
|--------------------------------------------------------------------------------------------------|-----------------|-------------------|------------------|--------------------|
| My supervisor is unhelpful (R)                                                                   | -.19            | .06               | --               | --                 |
| My supervisor is controlling (R)                                                                 | .01*            | .06               | --               | --                 |
| My supervisor likes to remind me of the rules to follow (R)                                      | .39             | .05               | --               | --                 |
| My supervisor meets with me regularly(PSS1)                                                      | .57             | .05               | .51              | .05                |
| My supervisor knows when my next supervision meeting will take place                             | .49             | .05               | --               | --                 |
| My supervisor does not give me personal feedback (R)                                             | .17             | .05               | --               | --                 |
| My supervisor makes me uncomfortable or embarrassed by discussing my work in front of others (R) | -.01*           | .06               | --               | --                 |
| My supervisor appreciates me (PSS2)                                                              | .62             | .05               | .60              | .05                |
| My supervisor meets with me regularly to discuss problems and solutions(PSS3)                    | .57             | .05               | .53              | .05                |
| My supervisor takes into consideration my views and ideas (PSS4)                                 | .75             | .03               | .77              | .03                |
| My supervisor is a good communicator (PSS5)                                                      | .76             | .03               | .77              | .03                |
| My supervisor helps me to update my knowledge (PSS6)                                             | .61             | .05               | .65              | .05                |

*Note:* n = 323; (R) = negatively worded items; \*factor loadings are not statistically significant (p > .05)

**Table S3.** Standardized factor loadings (standard errors) for the Perceived Supervision Scale (PSS) and Composite Reliability (CR) results.

|               | PSS1         | PSS2         | PSS3         | PSS4         | PSS5         | PSS6         | Mean Factor Loading | CR  |
|---------------|--------------|--------------|--------------|--------------|--------------|--------------|---------------------|-----|
| <b>Time 0</b> |              |              |              |              |              |              |                     |     |
| Bangladesh    | .71<br>(.07) | .68<br>(.05) | .92<br>(.04) | .73<br>(.06) | .93<br>(.04) | .71<br>(.07) | .78                 | .91 |
| Ethiopia      | .75<br>(.05) | .80<br>(.04) | .95<br>(.03) | .88<br>(.04) | .90<br>(.03) | .84<br>(.04) | .85                 | .94 |
| Indonesia     | .49<br>(.09) | .89<br>(.08) | .49<br>(.11) | .46<br>(.09) | .82<br>(.08) | .93<br>(.06) | .68                 | .85 |
| Kenya         | .83<br>(.04) | .92<br>(.03) | .96<br>(.02) | .91<br>(.03) | .98<br>(.02) | .91<br>(.02) | .92                 | .97 |
| Malawi        | .66<br>(.05) | .64<br>(.05) | .78<br>(.04) | .85<br>(.03) | .84<br>(.04) | .85<br>(.04) | .77                 | .90 |
| Mozambique    | .61<br>(.06) | .87<br>(.05) | .89<br>(.03) | .91<br>(.05) | .97<br>(.04) | .77<br>(.06) | .84                 | .94 |
| <b>Time 1</b> |              |              |              |              |              |              |                     |     |
| Bangladesh    | .60<br>(.06) | .79<br>(.06) | .93<br>(.03) | .75<br>(.05) | .94<br>(.03) | .88<br>(.04) | .82                 | .93 |
| Ethiopia      | .68<br>(.05) | .80<br>(.04) | .94<br>(.02) | .95<br>(.02) | .82<br>(.04) | .77<br>(.04) | .83                 | .93 |
| Indonesia     | .67<br>(.08) | .62<br>(.07) | .70<br>(.07) | .80<br>(.06) | .74<br>(.07) | .88<br>(.05) | .74                 | .90 |
| Kenya         | --           | --           | --           | --           | --           | --           | --                  |     |
| Malawi        | .63<br>(.06) | .70<br>(.06) | .78<br>(.05) | .80<br>(.05) | .91<br>(.05) | .82<br>(.05) | .77                 | .90 |

|               |              |               |              |               |               |              |     |     |
|---------------|--------------|---------------|--------------|---------------|---------------|--------------|-----|-----|
| Mozambique    | .60<br>(.07) | .83<br>(.07)  | .83<br>(.05) | .62<br>(.05)  | .96<br>(.03)  | .73<br>(.07) | .76 | .90 |
| <b>Time 2</b> |              |               |              |               |               |              |     |     |
| Bangladesh    | .85<br>(.03) | .91<br>(.04)  | .86<br>(.04) | .89<br>(.04)  | 1.00<br>(.03) | .95<br>(.03) | .91 | .97 |
| Ethiopia      | .50<br>(.10) | .11<br>(.11)* | .61<br>(.08) | .22<br>(.10)^ | .73<br>(.07)  | .80<br>(.08) | .50 | .68 |
| Indonesia     | .68<br>(.06) | .54<br>(.05)  | .96<br>(.04) | .38<br>(.07)  | .95<br>(.04)  | .43<br>(.06) | .66 | .83 |
| Kenya         | .77<br>(.05) | .96<br>(.02)  | .83<br>(.05) | .93<br>(.03)  | .85<br>(.04)  | .97<br>(.01) | .89 | .96 |
| Malawi        | .51<br>(.06) | .51<br>(.05)  | .78<br>(.05) | .81<br>(.04)  | .84<br>(.04)  | .87<br>(.03) | .72 | .87 |
| Mozambique    | .60<br>(.07) | .82<br>(.08)  | .79<br>(.05) | .53<br>(.06)  | .91<br>(.04)  | .66<br>(.08) | .72 | .87 |

Note: All standardized factor loadings are significant ( $p < .001$ ) except \* ( $p > .05$ ) and ^ ( $p < .05$ ).
